# Supplementary material for: Surface pre-reacted glass-ionomer eluate protects gingival epithelium from penetration by lipopolysaccharides and peptidoglycans via transcription factor EB pathway
Source: PubMed Central journal article supplement (PMC9328573; doi:10.1371/journal.pone.0271192), 2022-07-27

# Figure S8. Immunoblots performed in this study

## Figure 1

IB: anti-JAM1

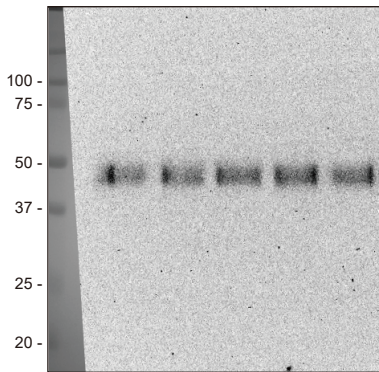

IB: anti-CXADR

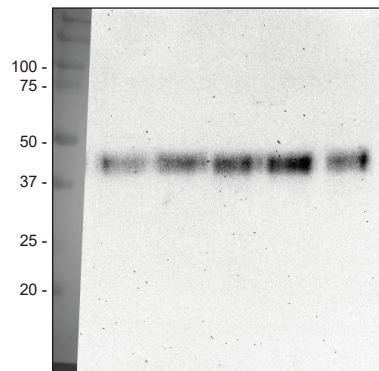

IB: anti- $\beta$ -ACTIN

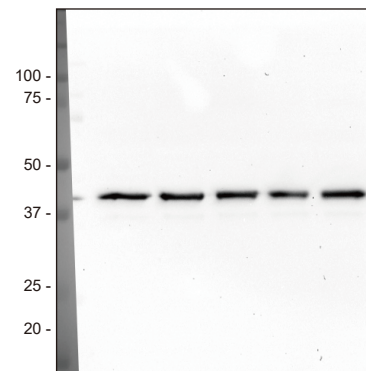

## Figure 4

IB: anti-CXADR

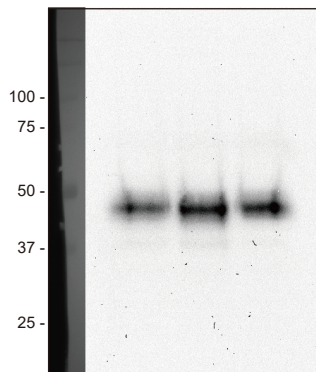

IB: anti- $\beta$ -ACTIN

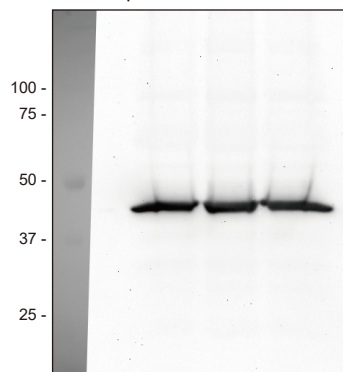

## Figure 6

IB: anti-CXADR

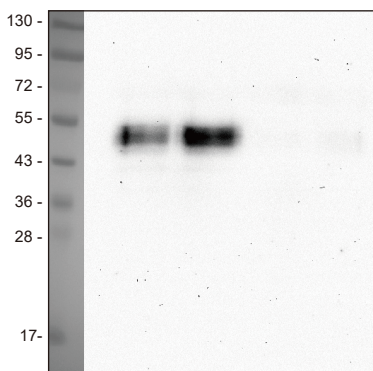

IB: anti- $\beta$ -ACTIN

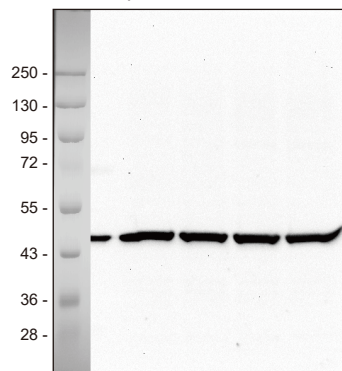

Supplement: pone.0271192.s008.pdf [file pone.0271192.s008.pdf]
